# Supplementary material for: Resolving the Loss of Intermediate-Size Speech Aerosols in Funnel-Guided Particle Counting Measurements
Source: MDPI journal article supplement (doi:10.3390/atmos15050570), 2024-05-07
Supplement: s1 [file s1]

# **Resolving the Loss of Intermediate Size Speech Aerosol in Funnel-Guided Particle Counting Measurements**

Tayeb Kakeshpour and Adriaan Bax

Laboratory of Chemical Physics, National Institute of Diabetes and Digestive and Kidney Diseases, National Institutes of Health, Bethesda, MD, USA

Supplementary Material

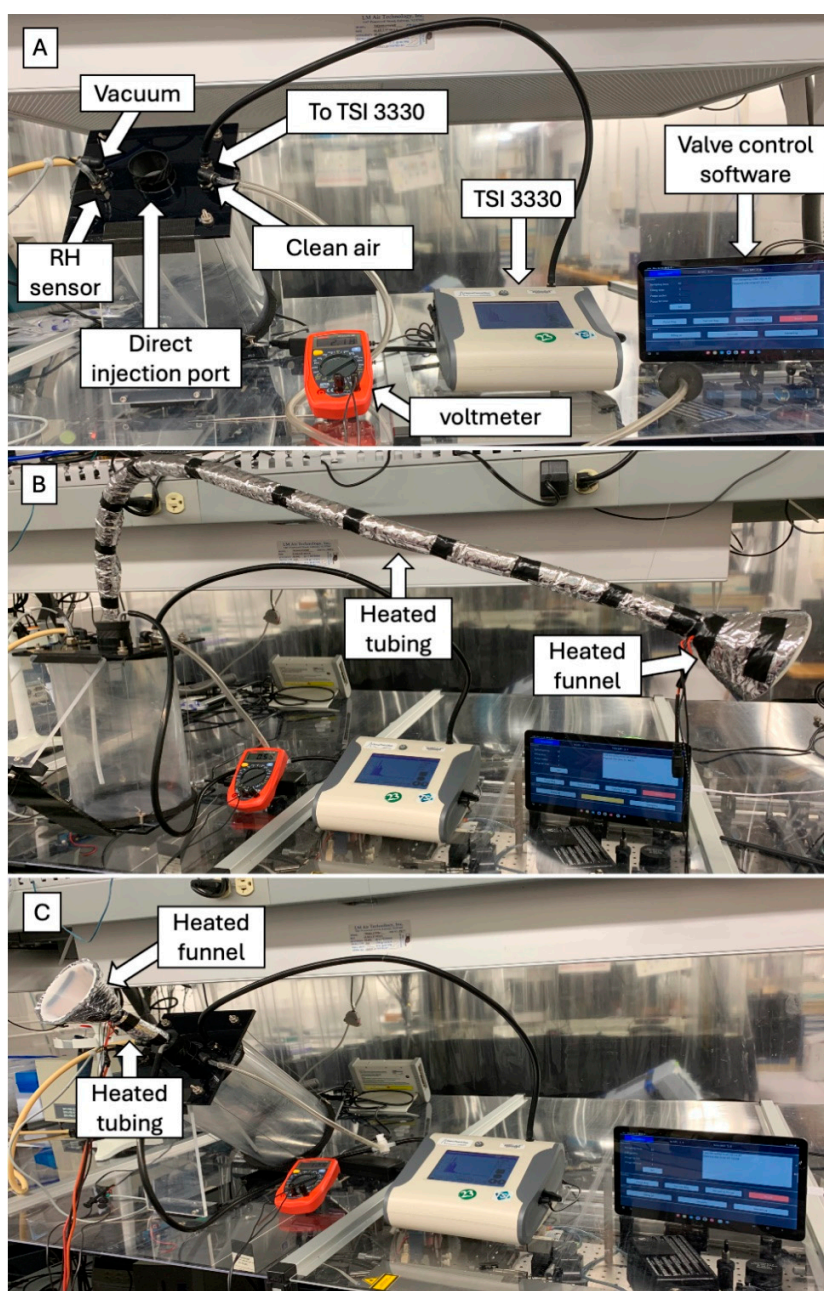

**Figure S1.** Experimental setup for the three modes of respiratory aerosol collection. (A) Direct injection; (B) Using a funnel and 1-m conductive tubing, covered in heating elements and thermal insulation; (C) Using a funnel connected by 7.5-cm length, large diameter tubing, to the dehydration chamber. The dehydration chamber is tilted at *ca* 35° when entering respiratory aerosols for (A) and (C), but immediately thereafter flipped to vertical, prior to starting aerosol measurements by the TSI-3330.
